# Supplementary material
Source: PubMed Central journal article supplement (PMC3873163)

Fig S2. Analyses of the RNA-seq replicates for the same tissue shows high correlation between replicates. P-values are based on a Pearson test.

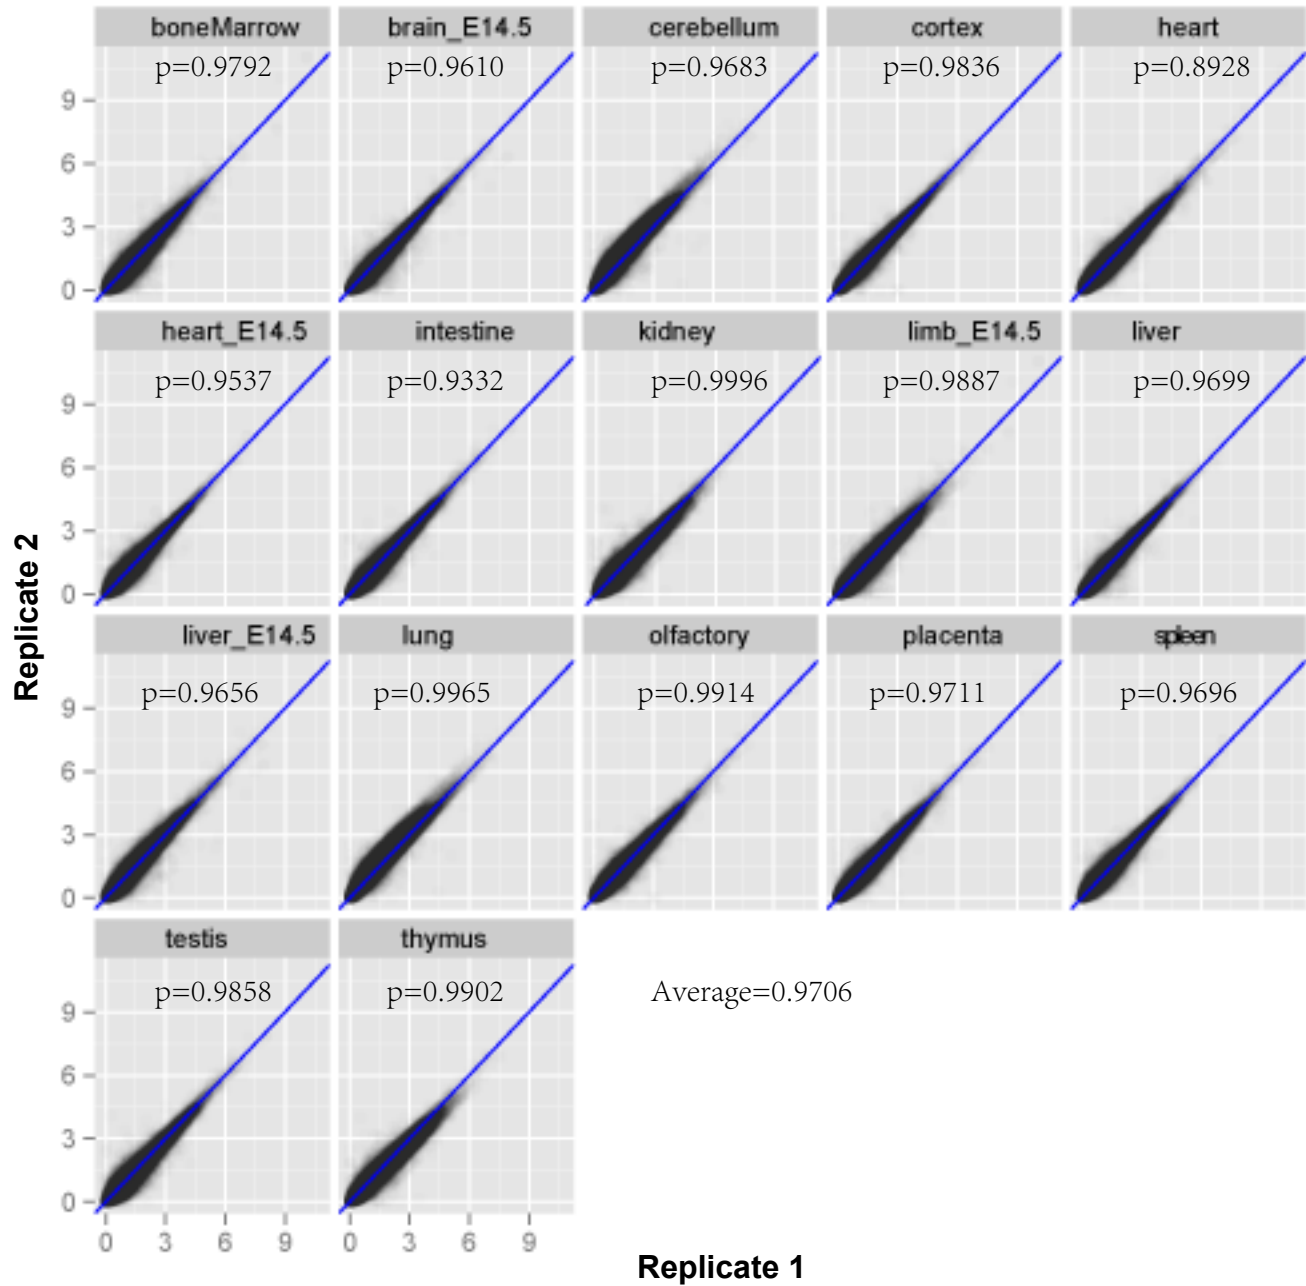

Supplement: NIHMS538368-supplement-Figure_S2.pdf [file NIHMS538368-supplement-Figure_S2.pdf]
