# Supplementary material
Source: PubMed Central journal article supplement (PMC3873163)

Fig. S3. Distribution of gene regulation domain scores for each tissue. Lines indicate the bottom and top quartiles.

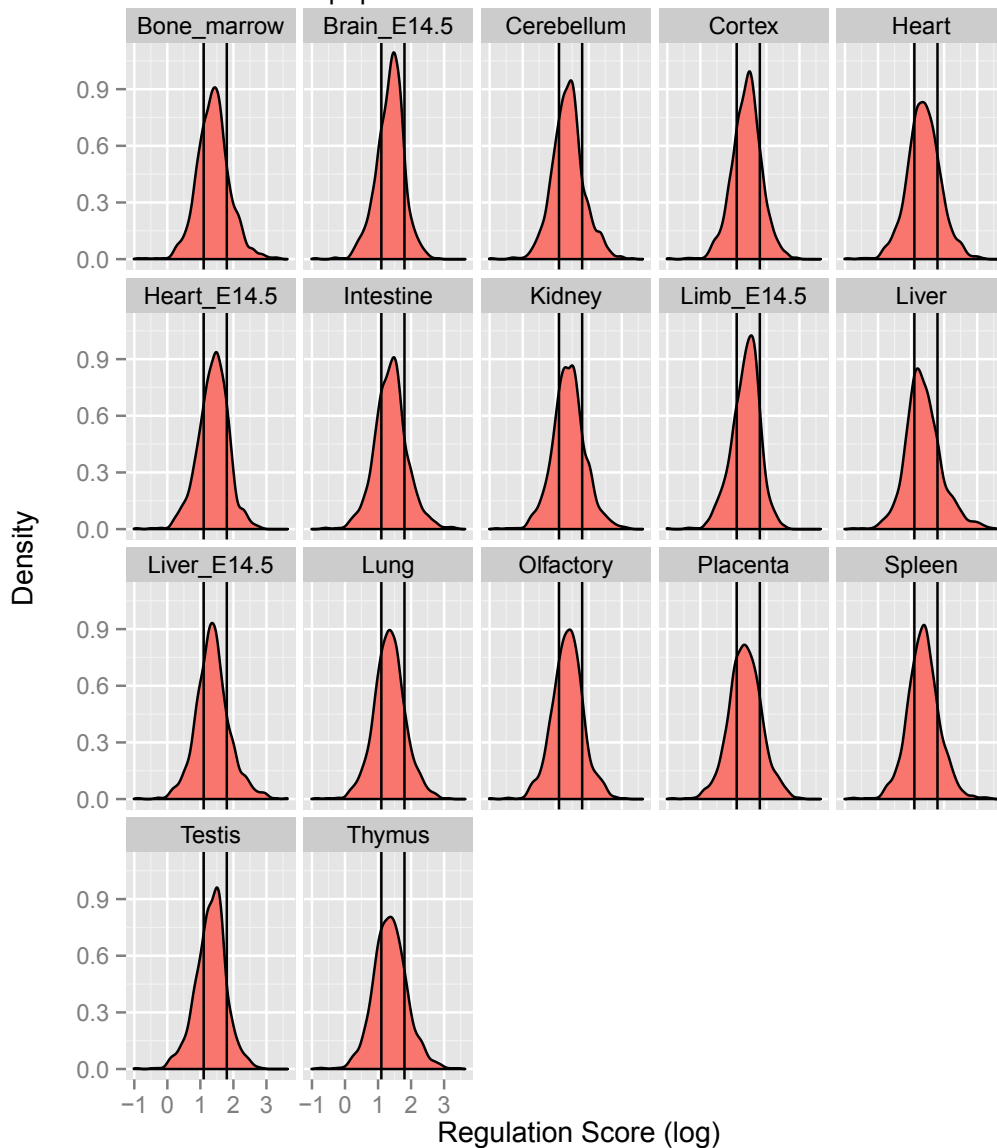

Supplement: NIHMS538368-supplement-Figure_S3.pdf [file NIHMS538368-supplement-Figure_S3.pdf]
