# Supplementary material
Source: PubMed Central journal article supplement (PMC3873163)

Fig. S4. Distribution of gene expression domain scores for each tissue. Lines indicate the bottom and top quartiles.

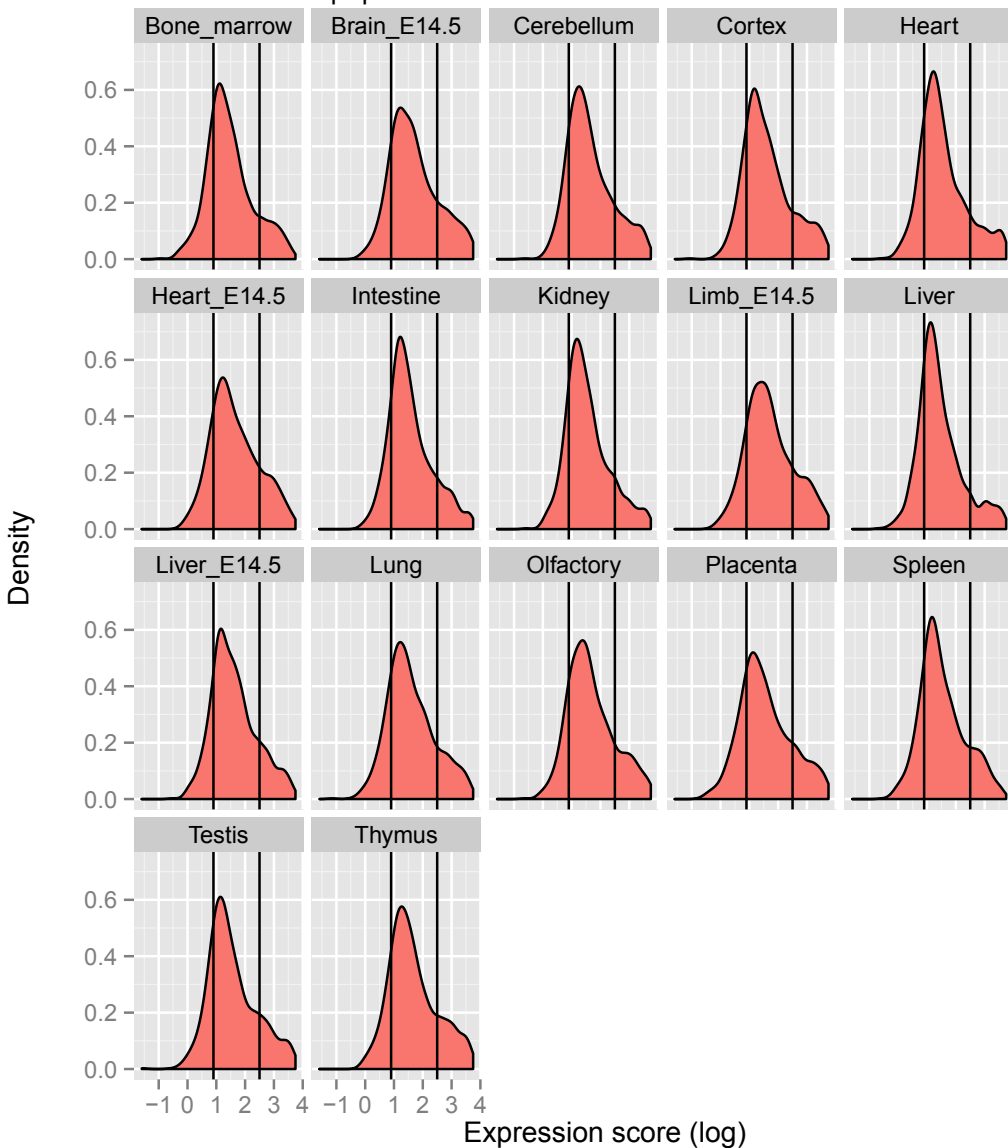

Supplement: NIHMS538368-supplement-Figure_S4.pdf [file NIHMS538368-supplement-Figure_S4.pdf]
