# Supplementary material
Source: PubMed Central journal article supplement (PMC3873163)

Fig. S5. Boxplots showing the overall similarity for each tissue between domain type and the different tissues.

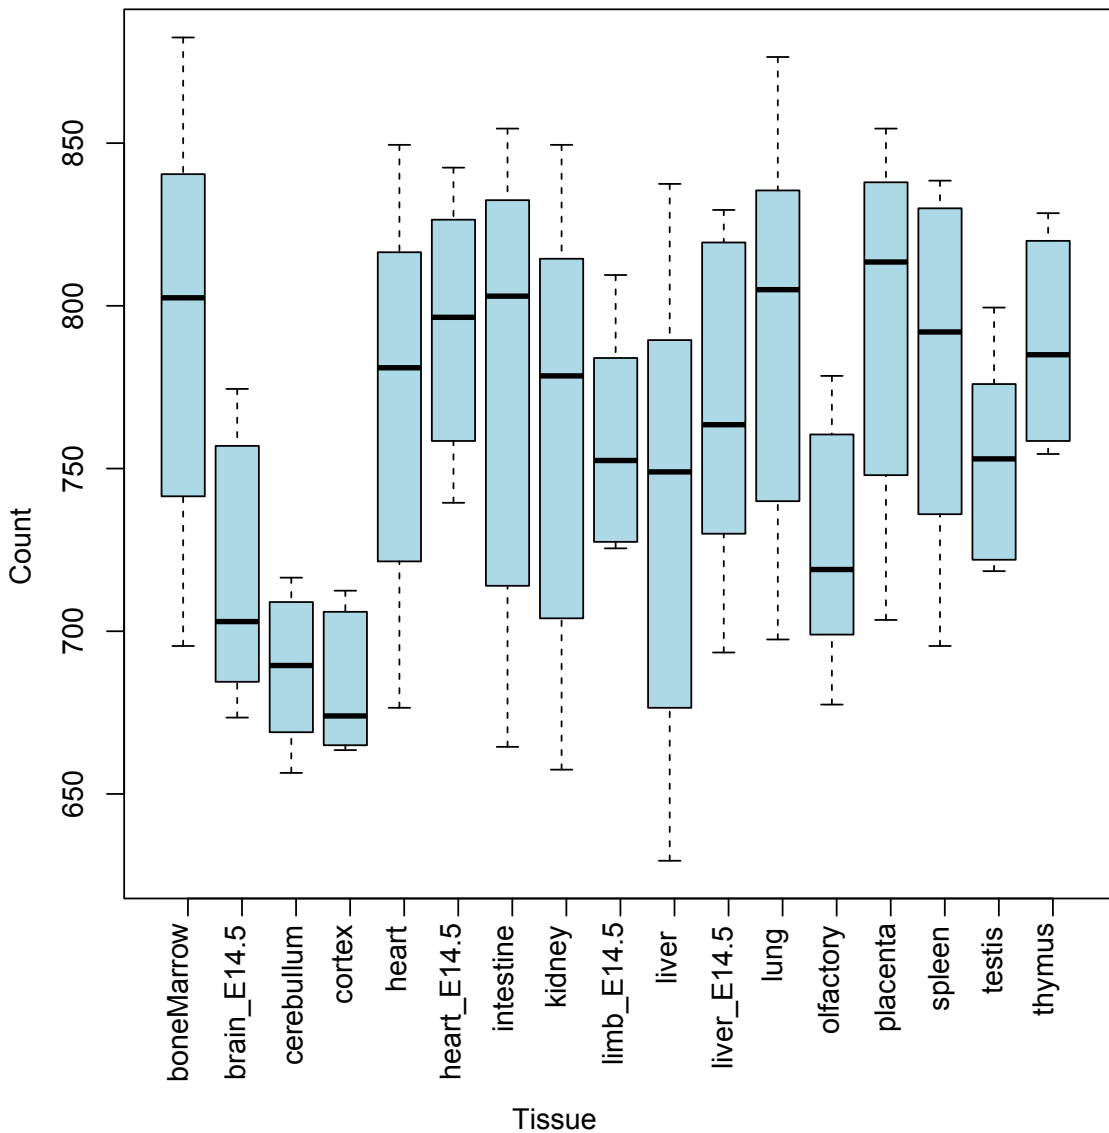

Supplement: NIHMS538368-supplement-Figure_S5.pdf [file NIHMS538368-supplement-Figure_S5.pdf]
