# Supplementary material
Source: PubMed Central journal article supplement (PMC3873163)

Fig S1. Length distribution of the 1,175 topological domains.

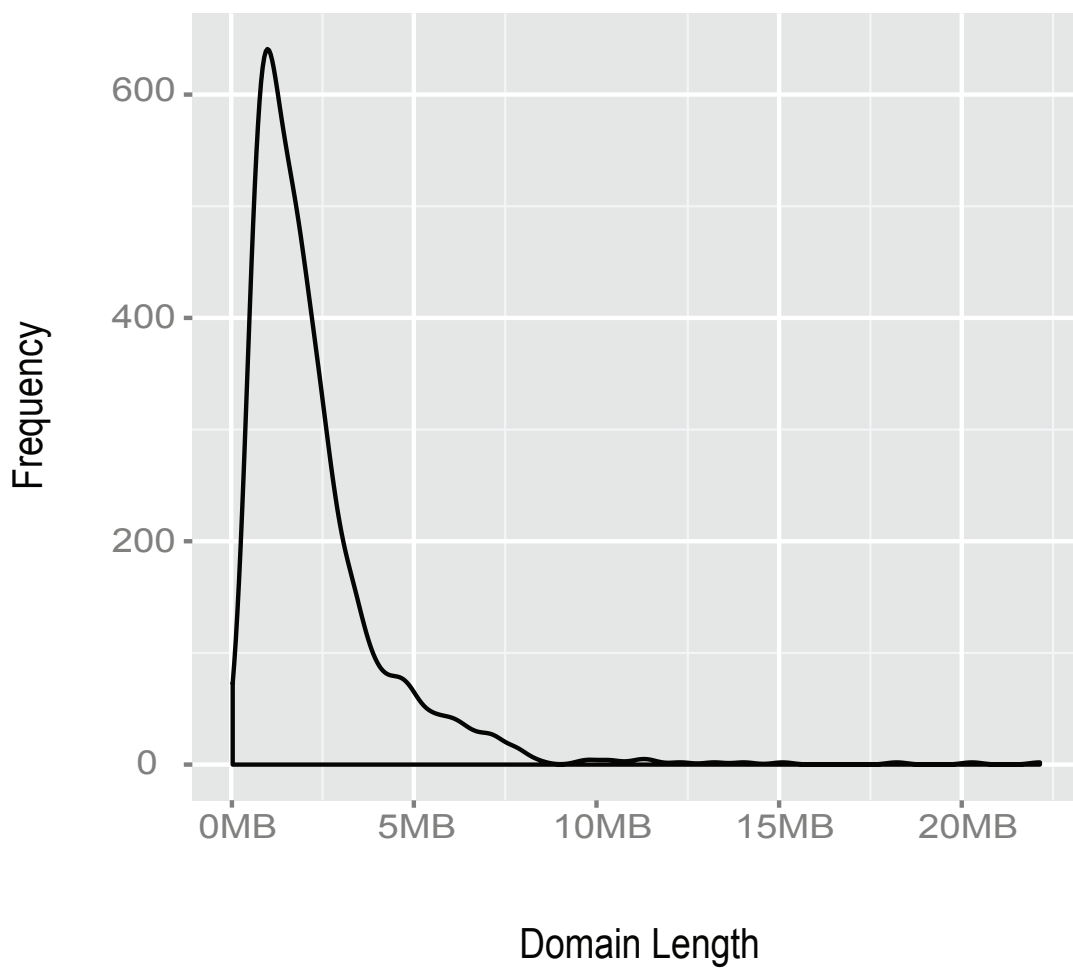

Supplement: NIHMS538368-supplement-Figure_S1.pdf [file NIHMS538368-supplement-Figure_S1.pdf]
